# Supplementary material for: Solubility Data of the Bioactive Compound Piperine in (Transcutol + Water) Mixtures: Computational Modeling, Hansen Solubility Parameters and Mixing Thermodynamic Parameters
Source: PubMed Central journal article supplement (PMC7355804; doi:10.3390/molecules25122743), 2020-06-13
Supplement: molecules-25-02743-s001.pdf [file molecules-25-02743-s001.pdf]

**Solubility Data of the Bioactive Compound Piperine in (Transcutol + Water) Mixtures:  
Computational Modeling, Hansen Solubility Parameters and Mixing Thermodynamic  
Parameters**

**Faiyaz Shakeel, Nazrul Haq and Sultan Alshehri\***

Department of Pharmaceutics, College of Pharmacy, King Saud University, P.O. Box 2457,  
Riyadh 11451, Saudi Arabia

**\*Corresponding Author:**

Dr. Sultan Alshehri,

Department of Pharmaceutics, College of Pharmacy,

King Saud University, Riyadh, Saudi Arabia

Email: [aslshehri@ksu.edu.sa](mailto:aslshehri@ksu.edu.sa)

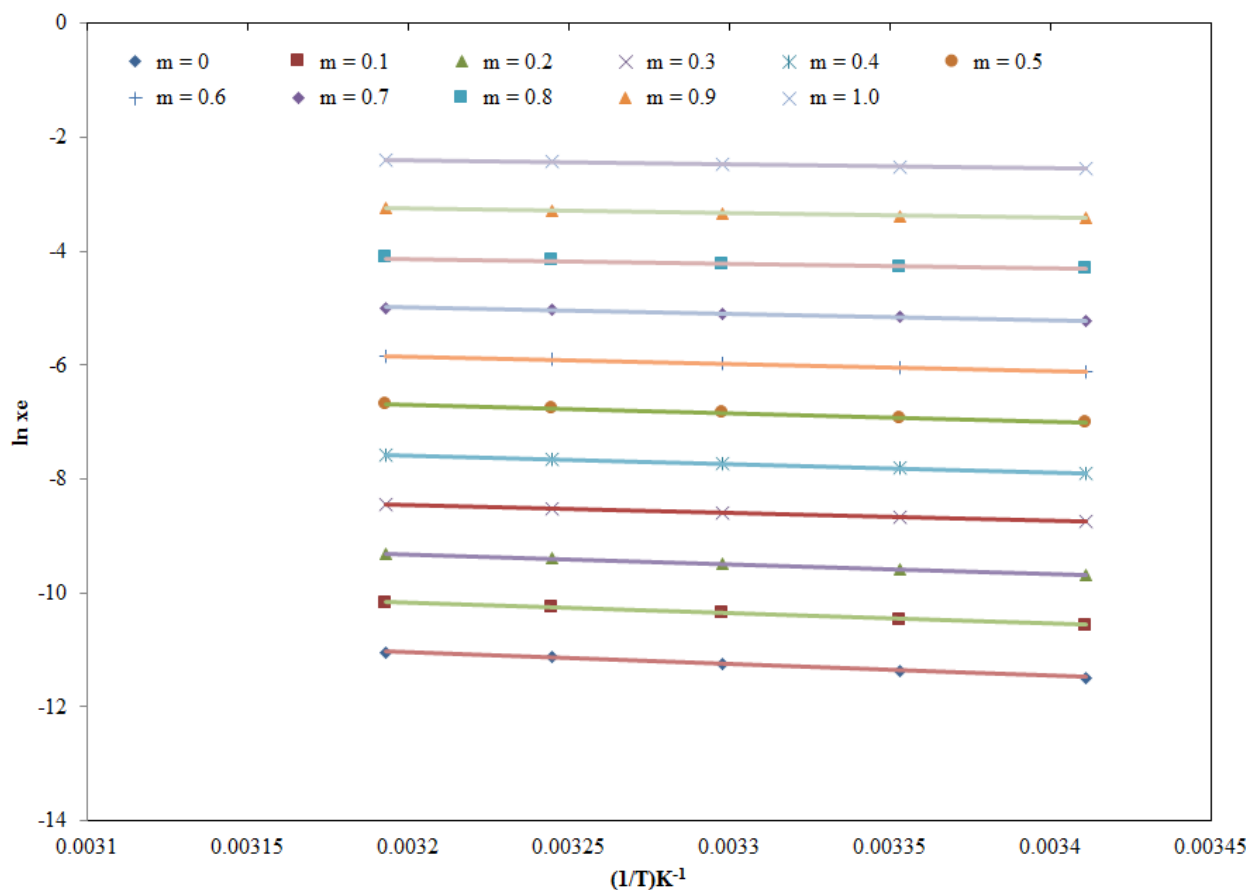

**Figure S1.** Correlation of experimental solubility values of PPN with Van't Hoff model in different THP + water mixtures at  $T = 298.2$  K to  $318.2$  K; Van't Hoff model solubility values of PPN are represented by solid lines, and experimental solubility values of PPN are represented by the symbols.

**Table S1.** Hansen solubility parameters ( $\delta_{\text{mix}}/\text{MPa}^{1/2}$ ) for various THP + water mixtures free of PPN at  $T = 298.2$  K

| $m$ | $\delta_{\text{mix}}/\text{MPa}^{1/2}$ |
|-----|----------------------------------------|
| 0.1 | 45.16                                  |
| 0.2 | 42.52                                  |
| 0.3 | 39.88                                  |
| 0.4 | 37.24                                  |
| 0.5 | 34.60                                  |
| 0.6 | 31.96                                  |
| 0.7 | 29.32                                  |
| 0.8 | 26.68                                  |
| 0.9 | 24.04                                  |

**Table S2.** The values of mixing enthalpy ( $\Delta_{\text{mix}}H/\text{J mol}^{-1}$ ), mixing entropy ( $\Delta_{\text{mix}}S/\text{J mol}^{-1} \text{K}^{-1}$ ), mixing Gibbs energy ( $\Delta_{\text{mix}}G/\text{J mol}^{-1}$ ) and activity coefficient ( $\gamma_i$ ) for PPN dissolution in different THP + water mixtures<sup>a</sup>.

| $T/\text{K}$   | $\Delta_{\text{mix}}H/\text{J mol}^{-1}$ | $\Delta_{\text{mix}}G/\text{J mol}^{-1}$ | $\Delta_{\text{mix}}S/\text{J mol}^{-1} \text{K}^{-1}$ | $\gamma_i$ |
|----------------|------------------------------------------|------------------------------------------|--------------------------------------------------------|------------|
| <i>m</i> = 0.0 |                                          |                                          |                                                        |            |
| 298.2          | -1170                                    | 774                                      | -6.52                                                  | 4980       |
| 303.2          | -1200                                    | 791                                      | -6.55                                                  | 5150       |
| 308.2          | -1220                                    | 811                                      | -6.60                                                  | 5380       |
| 313.2          | -1250                                    | 830                                      | -6.63                                                  | 5620       |
| 318.2          | -1280                                    | 854                                      | -6.70                                                  | 6050       |
| <i>m</i> = 0.1 |                                          |                                          |                                                        |            |
| 298.2          | -955                                     | 571                                      | -5.12                                                  | 1995       |
| 303.2          | -978                                     | 587                                      | -5.16                                                  | 2108       |
| 308.2          | -1000                                    | 603                                      | -5.20                                                  | 2215       |
| 313.2          | -1020                                    | 620                                      | -5.25                                                  | 2329       |
| 318.2          | -1050                                    | 641                                      | -5.32                                                  | 2533       |
| <i>m</i> = 0.2 |                                          |                                          |                                                        |            |
| 298.2          | -764                                     | 397                                      | -3.89                                                  | 827        |
| 303.2          | -784                                     | 411                                      | -3.94                                                  | 875        |
| 308.2          | -803                                     | 424                                      | -3.98                                                  | 927        |
| 313.2          | -824                                     | 438                                      | -4.02                                                  | 984        |
| 318.2          | -847                                     | 455                                      | -4.09                                                  | 1070       |
| <i>m</i> = 0.3 |                                          |                                          |                                                        |            |
| 298.2          | -589                                     | 242                                      | -2.78                                                  | 322        |
| 303.2          | -608                                     | 255                                      | -2.84                                                  | 353        |
| 308.2          | -626                                     | 267                                      | -2.89                                                  | 380        |
| 313.2          | -646                                     | 281                                      | -2.96                                                  | 416        |
| 318.2          | -665                                     | 294                                      | -3.01                                                  | 448        |
| <i>m</i> = 0.4 |                                          |                                          |                                                        |            |
| 298.2          | -443                                     | 119                                      | -1.88                                                  | 138        |
| 303.2          | -457                                     | 128                                      | -1.93                                                  | 148        |
| 308.2          | -472                                     | 137                                      | -1.97                                                  | 160        |
| 313.2          | -487                                     | 146                                      | -2.02                                                  | 173        |
| 318.2          | -503                                     | 157                                      | -2.07                                                  | 189        |
| <i>m</i> = 0.5 |                                          |                                          |                                                        |            |
| 298.2          | -316                                     | 16                                       | -1.11                                                  | 56         |
| 303.2          | -328                                     | 23                                       | -1.15                                                  | 61         |
| 308.2          | -338                                     | 28                                       | -1.19                                                  | 65         |
| 313.2          | -351                                     | 36                                       | -1.23                                                  | 71         |
| 318.2          | -363                                     | 43                                       | -1.27                                                  | 77         |
| <i>m</i> = 0.6 |                                          |                                          |                                                        |            |
| 298.2          | -208                                     | -63                                      | -0.48                                                  | 23         |
| 303.2          | -217                                     | -58                                      | -0.52                                                  | 25         |
| 308.2          | -227                                     | -52                                      | -0.56                                                  | 27         |
| 313.2          | -237                                     | -47                                      | -0.60                                                  | 30         |
| 318.2          | -248                                     | -41                                      | -0.65                                                  | 33         |
| <i>m</i> = 0.7 |                                          |                                          |                                                        |            |
| 298.2          | -123                                     | -117                                     | -0.02                                                  | 9          |
| 303.2          | -131                                     | -114                                     | -0.05                                                  | 10         |
| 308.2          | -138                                     | -110                                     | -0.09                                                  | 11         |
| 313.2          | -146                                     | -107                                     | -0.12                                                  | 12         |
| 318.2          | -155                                     | -102                                     | -0.16                                                  | 14         |

|                |     |      |      |      |
|----------------|-----|------|------|------|
| <i>m</i> = 0.8 |     |      |      |      |
| 298.2          | -57 | -147 | 0.30 | 3    |
| 303.2          | -63 | -144 | 0.26 | 4    |
| 308.2          | -70 | -142 | 0.23 | 5    |
| 313.2          | -75 | -140 | 0.20 | 5    |
| 318.2          | -81 | -137 | 0.17 | 6    |
| <i>m</i> = 0.9 |     |      |      |      |
| 298.2          | -14 | -149 | 0.45 | 1.57 |
| 303.2          | -18 | -147 | 0.42 | 1.79 |
| 308.2          | -22 | -146 | 0.40 | 2.00 |
| 313.2          | -26 | -145 | 0.37 | 2.23 |
| 318.2          | -30 | -144 | 0.35 | 2.49 |
| <i>m</i> = 1.0 |     |      |      |      |
| 298.2          | 8   | -111 | 0.40 | 0.65 |
| 303.2          | 6   | -110 | 0.38 | 0.74 |
| 308.2          | 4   | -110 | 0.36 | 0.83 |
| 313.2          | 1   | -110 | 0.35 | 0.94 |
| 318.2          | 1   | -110 | 0.34 | 1.06 |

<sup>a</sup>The average relative uncertainties are  $u(\Delta_{\text{mix}}H) = 0.90$ ,  $u(\Delta_{\text{mix}}G) = 2.04$  and  $u(\Delta_{\text{mix}}S) = 1.19$ .
